# Supplementary material for: pH/hyaluronidase dual responsive nano drug delivery systems for photothermal/chemotherapy combined treatment for non-small cell lung cancer
Source: Royal Society of Chemistry journal article supplement (doi:10.1039/d3nj03075j), 2023-01-01
Supplement: d3nj03075j1.pdf [file d3nj03075j1.pdf]

## Supporting Information

### pH/Hyaluronidase dual responsive nano drug delivery systems for photothermal/chemotherapy combined treatment for non-small cell lung cancer

Zihan Zhu,<sup>†,a</sup> Peigang Zhang,<sup>†,b</sup> Kexin An,<sup>a</sup> Kaihua Zhao,<sup>b</sup> Xianghui Chen,<sup>b</sup> Yuheng Pei,<sup>c</sup> Martin M. F. Choi,<sup>d</sup> Ning Wang<sup>\*,a</sup> and Wei Bian<sup>\*,a,b</sup>

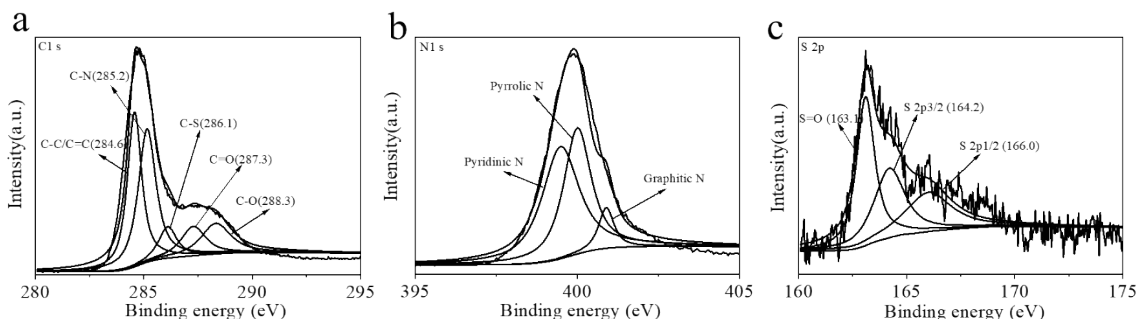

**Fig. S1.** The XPS spectrum of (a) C 1s, (b) N 1s and (c) S 2p of RCDs-HA.

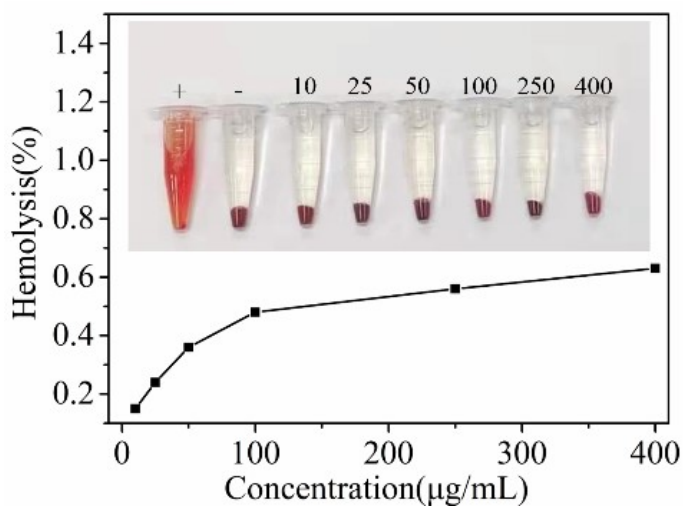

**Fig. S2.** Blood compatibility of RCDs-HA@AZD. The inset displays the pictures of blood samples with various concentrations of RCDs-HA@AZD.

<sup>a</sup> School of Basic Medical Science, Shanxi Medical University, Taiyuan 030000, China. \*Corresponding authors e-mail: weibian@sxmu.edu.cn, wangning@sxmu.edu.cn

<sup>b</sup> People's Hospital of Lvliang, Lvliang 033099, China

<sup>c</sup> Department of Neurology, Second Hospital of Shanxi Medical University, Tai Yuan, Shan Xi, China

<sup>d</sup> Bristol Chinese Christian Church, C/O Tyndale Baptist Church, 137-139 Whiteladies Road, Bristol BS8 2QG, UK.

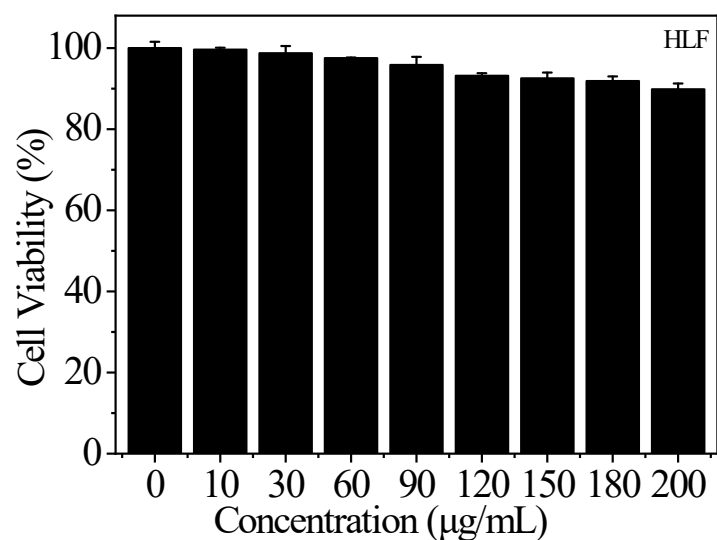

**Fig. S3.** Assessment of the cytocompatibility of RCDs-HA@AZD on HLF1 cells.

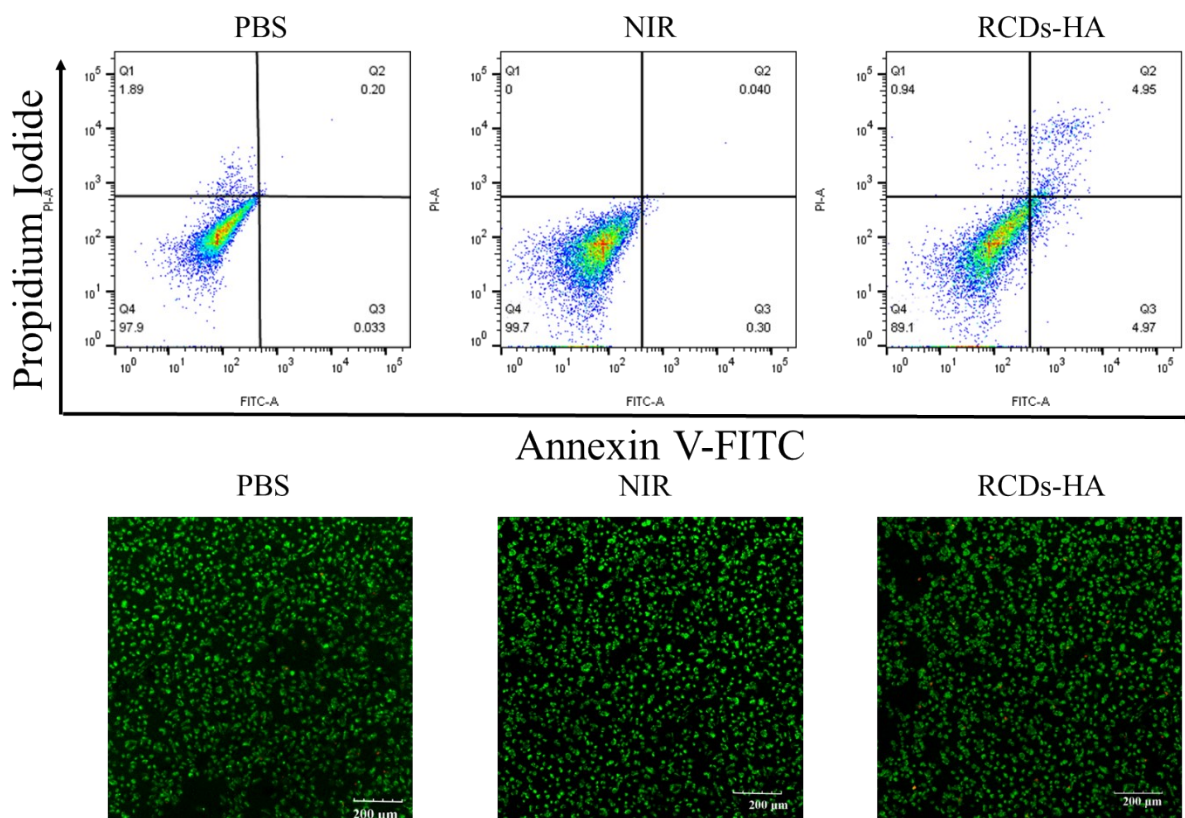

**Fig. S4.** (a) Effect of PBS, NIR irradiation and RCDs-HA on apoptosis of A549 cells. (b) CLSM images of AM-PI stained A549 cells after treating with PBS, NIR irradiation and RCDs-HA.
